# Supplementary material for: Mechanistic insights into heterogeneous methane activation
Source: Royal Society of Chemistry journal article supplement (doi:10.1039/c6cp08003k), 2017-01-01
Supplement: c6cp08003k1.pdf [file c6cp08003k1.pdf]

## Supporting Information

*for*

### **Mechanistic Insights into Heterogeneous Methane Activation**

Allegra A. Latimer,<sup>1</sup> Hassan Aljama,<sup>1</sup> Arvin Kakekhani,<sup>1</sup> Jong Suk Yoo,<sup>1</sup> Ambarish Kulkarni,<sup>1</sup> Charlie Tsai,<sup>1</sup>  
Max Garcia-Melchor,<sup>1</sup> Frank Abild-Pedersen,<sup>1,2</sup> Jens K. Nørskov<sup>1,2,\*</sup>

<sup>1</sup> SUNCAT Center for Interface Science and Catalysis, Department of Chemical Engineering, Stanford  
University, 450 Serra Mall Stanford, California 94305, USA

<sup>2</sup> SUNCAT Center for Interface Science and Catalysis, SLAC National Accelerator Laboratory, 2575 Sand Hill  
Road, Menlo Park, California 94025, United States

\* corresponding author: [norskov@stanford.edu](mailto:norskov@stanford.edu)

**Table 1.** A complete list of energies used in all figures and calculations. Values are referenced to CH<sub>4</sub>, H<sub>2</sub>O and O<sub>2</sub>.

| Class                                           | Catalyst         | EH    | EFS   | Radical TS | Surface-Stabilized TS |
|-------------------------------------------------|------------------|-------|-------|------------|-----------------------|
| 110 Rutile Oxide (O <sup>b</sup> ) <sup>a</sup> | IrO <sub>2</sub> | -0.27 | -1.56 | 0.94       | 0.17                  |
| 110 Rutile Oxide (O <sup>b</sup> )              | RuO <sub>2</sub> | 0.03  | -0.30 | n.c.       | 0.71                  |
| 110 Rutile Oxide (O <sup>b</sup> )              | TiO <sub>2</sub> | 0.83  | 0.53  | n.c.       | 1.37                  |
| 110 Rutile Oxide (O <sup>b</sup> )              | RhO <sub>2</sub> | -0.74 | -1.33 | n.c.       | 0.41                  |
| 110 Rutile Oxide (O <sup>c</sup> ) <sup>b</sup> | IrO <sub>2</sub> | -0.79 | 0.56  | 0.33       | n.c.                  |
| 110 Rutile Oxide (O <sup>c</sup> )              | RuO <sub>2</sub> | -0.09 | 1.03  | 0.95       | n.c.                  |
| 110 Rutile Oxide (O <sup>c</sup> )              | RhO <sub>2</sub> | -1.05 | 0.17  | 0.14       | n.c.                  |
| 110 Rutile Oxide (O <sup>c</sup> )              | MoO <sub>2</sub> | 0.98  | 2.19  | 1.83       | n.c.                  |
| 111 Clean Metal                                 | Ag               | 1.69  | 2.08  | 2.76       | 2.55                  |
| 111 Clean Metal                                 | Cu               | 1.27  | 1.40  | 2.27       | 1.88                  |
| 111 Clean Metal                                 | Pd               | 0.79  | 0.32  | 1.85       | 0.95                  |
| 111 Clean Metal                                 | Pt               | 0.95  | 0.25  | 2.14       | 0.99                  |
| 111 Clean Metal                                 | Rh               | 0.88  | 0.38  | 1.95       | 0.88                  |
| 111 Clean Metal                                 | Au               | 1.72  | 1.79  | 2.53       | 2.27                  |
| 111 O-Promoted Metal                            | Ag               | -0.41 | -0.02 | 0.95       | n.s.                  |
| 111 O-Promoted Metal                            | Cu               | 0.37  | 0.46  | 1.52       | 1.45                  |
| 111 O-Promoted Metal                            | Pd               | 0.56  | 0.14  | 1.50       | 1.50                  |
| 111 O-Promoted Metal                            | Pt               | 0.60  | -0.05 | 1.52       | 1.41                  |
| 111 O-Promoted Metal                            | Rh               | 0.86  | 0.41  | 1.80       | 1.44                  |
| 111 O-Promoted Metal                            | Au               | -0.19 | -0.08 | 1.15       | n.s.                  |
| 111 O-Promoted Metal                            | Ir               | 0.87  | 0.23  | 2.04       | 1.61                  |
| 111 O-Promoted Metal                            | Re               | 1.49  | 1.21  | 2.43       | 1.42                  |
| 111 O-Promoted Metal                            | Ru               | 1.12  | 0.68  | 2.05       | 1.39                  |
| 111 OH-Promoted Metal                           | Ag               | 0.62  | 1.01  | n.c.       | 1.39                  |
| 111 OH-Promoted Metal                           | Cu               | 1.03  | 1.15  | n.c.       | 1.63                  |
| 111 OH-Promoted Metal                           | Pd               | 0.57  | 0.10  | n.c.       | 1.16                  |
| 111 OH-Promoted Metal                           | Pt               | 0.24  | -0.46 | n.c.       | 0.89                  |
| 111 OH-Promoted Metal                           | Rh               | 0.92  | 0.43  | n.c.       | 1.25                  |

<sup>a</sup> Hydrogen abstraction takes place at a bridging oxygen

<sup>b</sup> Hydrogen abstraction takes places at a cus oxygen

|                                     |                       |       |       |      |       |
|-------------------------------------|-----------------------|-------|-------|------|-------|
| 111 OH-Promoted Metal               | Au                    | -0.01 | 0.06  | n.c. | 1.18  |
| MgO (110)                           | Li-Doped <sup>c</sup> | -0.97 | -0.05 | 0.54 | n.c.  |
| MgO (110)                           | Na-Doped              | -0.63 | 0.63  | 0.67 | n.c.  |
| MgO (110)                           | K-Doped               | -0.77 | 0.72  | 0.77 | n.c.  |
| MgO (110)                           | Undoped               | 1.46  | -0.09 | n.c. | 0.53  |
| MgO (321)                           | Undoped               | 0.06  | -1.67 | n.c. | -0.18 |
| MgO (111)                           | Undoped               | 1.29  | 0.96  | n.c. | 1.65  |
| CaO(110)                            | Undoped               | 0.83  | -0.21 | n.c. | 0.45  |
| PdO on Pd                           | -                     | 0.33  | -0.12 | n.c. | 1.20  |
| O@Ca@O@MoS <sub>2</sub>             | -                     | -1.01 | -0.31 | 0.83 | 1.10  |
| Doped MoS <sub>2</sub> <sup>d</sup> | Fe-Doped              | -1.01 | 0.10  | 0.83 | 1.10  |
| Doped MoS <sub>2</sub>              | Rh-Doped              | -0.51 | 0.58  | 0.65 | n.c.  |
| Doped MoS <sub>2</sub>              | Co-Doped              | -0.06 | 0.99  | 1.24 | n.c.  |
| Doped MoS <sub>2</sub>              | Ru-Doped              | -0.64 | 0.52  | 0.72 | n.c.  |
| Doped MoS <sub>2</sub>              | Ir-Doped              | 0.39  | 1.44  | 1.66 | n.c.  |
| Doped MoS <sub>2</sub>              | Cr-Doped              | 0.28  | 1.38  | 1.54 | n.c.  |
| Doped MoS <sub>2</sub>              | Cu-Doped              | 0.32  | 1.43  | 1.47 | n.c.  |
| Doped MoS <sub>2</sub>              | Au-Doped              | 1.35  | 0.92  | n.c. | 1.17  |
| Doped MoS <sub>2</sub>              | Rh-Doped              | 1.25  | 0.84  | n.c. | 1.19  |
| Doped MoS <sub>2</sub>              | Pt-Doped              | 1.65  | 0.99  | n.c. | 1.13  |

|      |                |
|------|----------------|
| n.c. | not calculated |
| n.s. | not stable     |

## Discussion of Scaling between $E_O$ and $E_H$ on O-Promoted Metals

For oxygen-promoted metals,  $E_H$  is defined as

$$E_H = E_{OH} - E_O \quad (1)$$

To understand how  $E_H$  scaled with  $E_C$ , we assume that  $E_O$  approximately scales with  $1/2E_C$  by bond order conservation, since oxygen has only two electrons available for bonding while carbon has four.

<sup>c</sup> Doped MgO systems consisted of an alkali metal substituted for a surface Mg. Hydrogen abstraction takes place at the oxygen adjacent to the dopant.

<sup>d</sup> In doped MoS<sub>2</sub> systems

$$E_O \approx \frac{1}{2}E_C + b \quad (2)$$

We also know that EOH scales with 1/2 EO as follows:

$$E_{OH} = \frac{1}{2}E_O + b \quad (3)$$

Plugging in expressions for EOH and EO in the definition for EH gives the following relationship, clearly showing we expect EH to scale as -1/4EC.

$$E_H = -\frac{1}{4}E_C + b \quad (4)$$

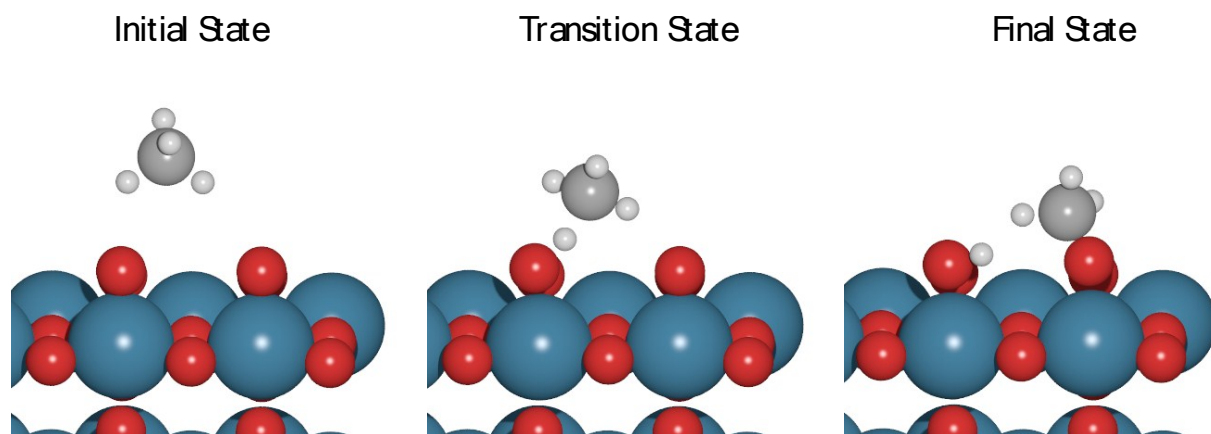

**Figure S1.** IS, TS and FS of methane activation on IrO<sub>2</sub>(110). The active sites are two coordinatively unsaturated (cus) oxygen atoms. A strictly energetic analysis would predict the methyl group to be surface-stabilized ( $E_H=-0.8$ ,  $E_{CH_3}=-2.0$ ), but the TS is clearly radical-like.

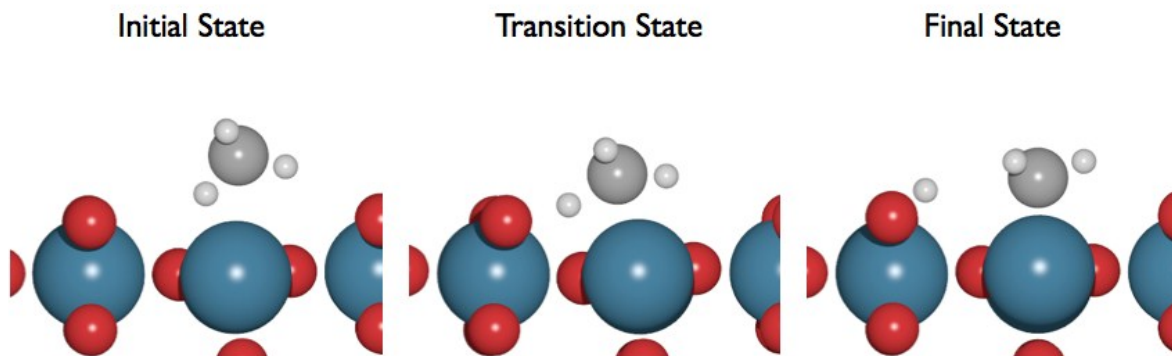

**Figure S2.** IS, TS and FS of methane activation on IrO<sub>2</sub>(110). The active sites are a bridging oxygen and a metal cus site. Here, the distance is comparable to the 2O<sup>c</sup> site shown in Fig. S1, but the TS is surface-stabilized. The notable difference is that the active site here is made up of an acid-base pair.
